# Supplementary material for: Visible-Light-Driven AO7 Photocatalytic Degradation and Toxicity Removal at Bi-Doped SrTiO3
Source: MDPI journal article supplement (doi:10.3390/ma15072465), 2022-03-27
Supplement: s1 [file s1]

# Visible-Light-Driven AO7 Photocatalytic Degradation and Toxicity Removal at Bi-Doped SrTiO<sub>3</sub>

Maria João Nunes\*, Ana Lopes, Maria José Pacheco and Lurdes Ciriaco

Fiber Materials and Environmental Technologies (FibEnTech-UBI), Universidade da Beira Interior, R. Marquês de D'Ávila e Bolama, 6200-001 Covilhã, Portugal

\*Correspondence: maria.nunes@ubi.pt

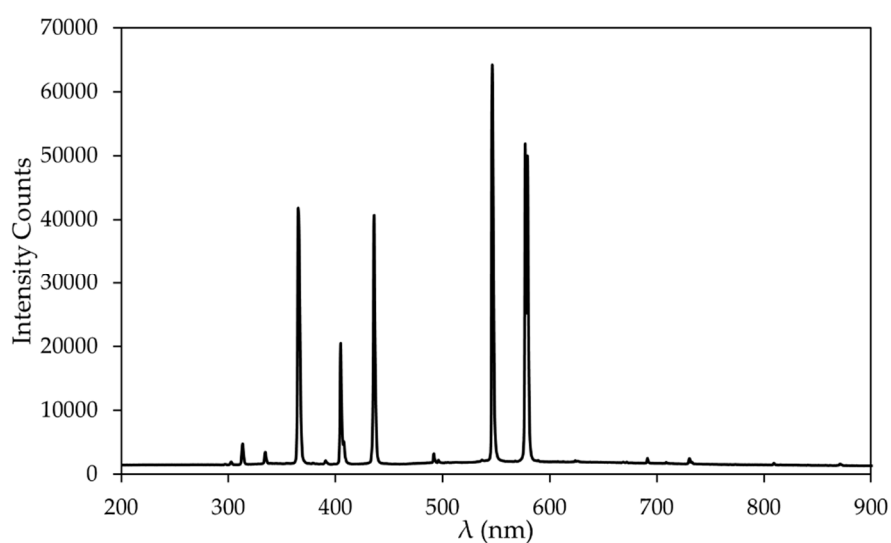

**Figure S1.** Emission spectrum of the 300 W Ultra-Vitalux lamp

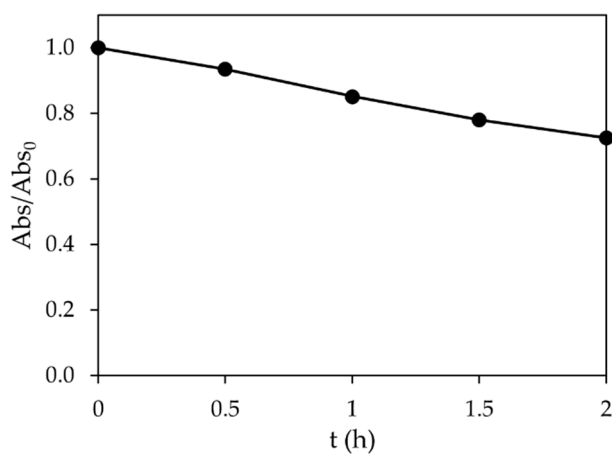

**Figure S2.** Relative Abs<sub>484nm</sub> decay for the photocatalytic degradation of AO7, with Bi<sub>4</sub>Ti<sub>3</sub>O<sub>12</sub>, under visible light (C<sub>i</sub> AO7 = 10 mg L<sup>-1</sup>, catalyst dose = 0.2 g L<sup>-1</sup>, natural pH)

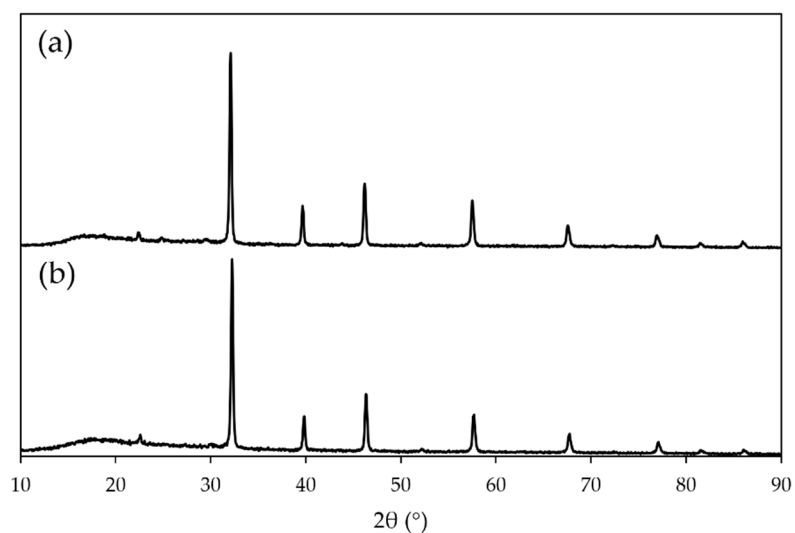

**Figure S3.** XRD patterns of  $\text{Sr}_{0.95}\text{Bi}_{0.05}\text{TiO}_3$  powder samples (a) before and (b) after application as photocatalyst

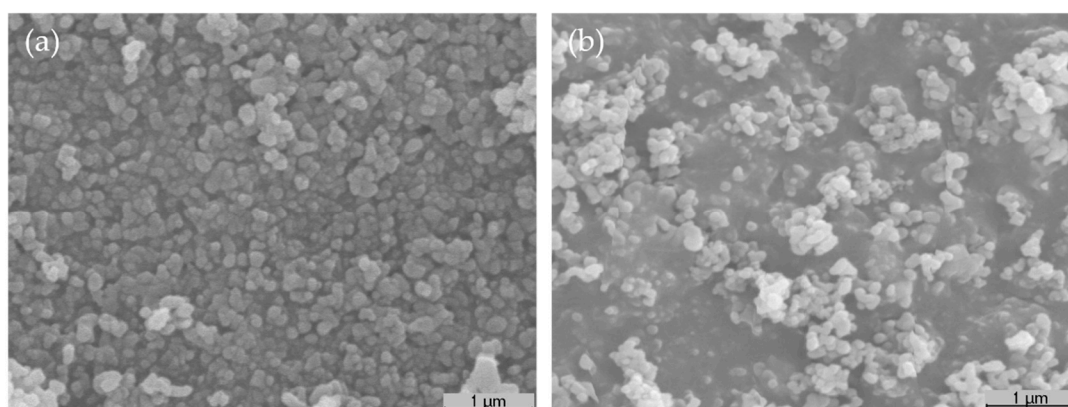

**Figure S4.** SEM microographies of the  $\text{Sr}_{0.95}\text{Bi}_{0.05}\text{TiO}_3$  (a) before and (b) after application as photocatalyst

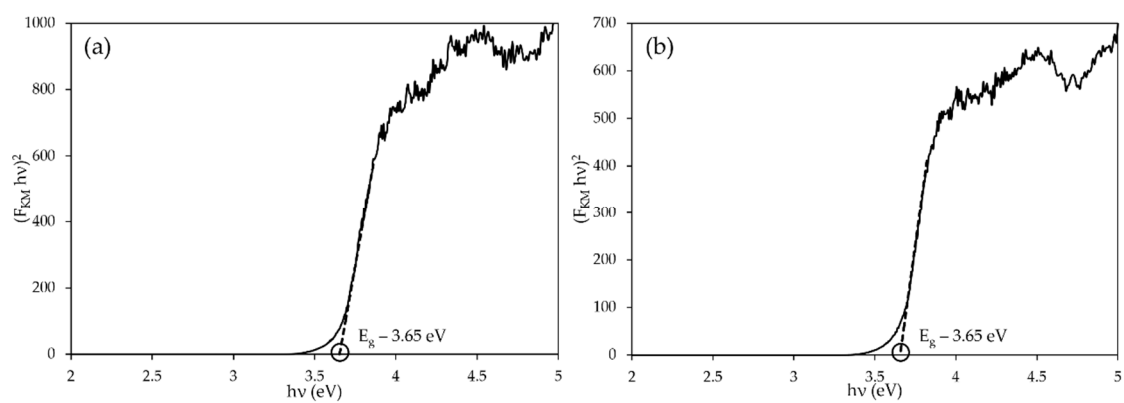

**Figure S5.**  $\text{Sr}_{0.95}\text{Bi}_{0.05}\text{TiO}_3$  band gap energy determination (a) before and (b) after application as photocatalyst
